# Supplementary material for: A ruthenium-carbamato-complex derived from a siloxylated amine and carbon dioxide for the oxidative α-cyanation of aromatic and cyclic tertiary amines
Source: Royal Society of Chemistry journal article supplement (doi:10.1039/c3ra44051f), 2013-01-01

## Supporting Information

### **Ruthenium-carbamato-complex derived from siloxylated amine and carbon dioxide for the oxidative $\alpha$ -cyanation of aromatic and cyclic tertiary amines.**

Subodh Kumar,<sup>a</sup> Suman L. Jain<sup>a\*</sup>

Chemical Sciences Division

CSIR-Indian Institute of Petroleum, Mohkampur, Dehradun-248005 (India)

[suman@iip.res.in](mailto:suman@iip.res.in)

#### **Contents**

|                                                                 |       |
|-----------------------------------------------------------------|-------|
| General.....                                                    | S1    |
| Spectra data of the products.....                               | S1-S4 |
| FTIR Spectra of ruthenium carbamato complex <b>3</b> .....      | S5    |
| <sup>1</sup> H & <sup>13</sup> C NMR spectra of <b>6a</b> ..... | S6    |
| <sup>1</sup> H & <sup>13</sup> C NMR spectra of <b>6b</b> ..... | S7    |
| <sup>1</sup> H & <sup>13</sup> C NMR spectra of <b>6c</b> ..... | S8    |
| <sup>1</sup> H & <sup>13</sup> C NMR spectra of <b>6d</b> ..... | S9    |
| <sup>1</sup> H & <sup>13</sup> C NMR spectra of <b>6e</b> ..... | S10   |
| <sup>1</sup> H & <sup>13</sup> C NMR spectra of <b>6f</b> ..... | S11   |
| <sup>1</sup> H & <sup>13</sup> C NMR spectra of <b>6g</b> ..... | S12   |
| <sup>1</sup> H & <sup>13</sup> C NMR spectra of <b>6h</b> ..... | S13   |
| <sup>1</sup> H & <sup>13</sup> C NMR spectra of <b>6i</b> ..... | S14   |

## General

The melting points were determined in open capillaries on a Buchi apparatus and are uncorrected. The  $^1\text{H}$  NMR and  $^{13}\text{C}$  NMR Spectra were recorded on Bruker 400 MHz spectrometer and the chemical shifts are expressed in  $\delta$  parts per million relative to tetramethylsilane (TMS) as internal standard. The conversions and selectivity of the products were determined by high resolution GCMSD, EI, quadrupole mass analyzer, EM detector.

*General experimental procedure:* A 25 mL round bottomed flask equipped with a magnetic stirrer bar was charged with tertiary amine (1 mmol), NaCN (1.2 mmol), MeOH (2 mL), catalyst **3** (2 mol %) and AcOH (1 mL). To the resulting stirred reaction mixture aqueous hydrogen peroxide (1.5 mmol, 35 wt-%) was added drop wise over a period of 30 min and the stirring was continued at room temperature. The progress of the reaction was monitored by TLC ( $\text{SiO}_2$ ). After completion of the reaction, the catalyst was recovered by precipitation with diethyl ether followed by filtration. The obtained organic layer was washed with water, dried over anhydrous  $\text{Na}_2\text{SO}_4$  and concentrated under vacuum to give crude product, which was purified by flash chromatography to afford pure  $\alpha$ -aminonitrile. The conversion of tertiary amines into corresponding  $\alpha$ -aminonitriles and their selectivity was determined by GC-MS (EI quadrupole mass analyzer, EM detector) and the identity of the selected products was established by comparing their spectral data with authentic samples. The values of  $^1\text{H}$  and  $^{13}\text{C}$  NMR spectra of the products are given as below:

*N*-Methyl-*N*-phenylaminoacetonitrile (Table 2, entry 1; **6a**):  $^1\text{H}$  NMR ( $\text{CDCl}_3$ )  $\delta$ : 3.03 (s, 3 H), 4.20 (s, 2 H), 6.80 (dd,  $J = 8.5$  and 1.2 Hz, 1H), 6.89 (dd,  $J = 6.2$  and 0.92 Hz, 1H), 6.95-7.20 (m, 3H);  $^{13}\text{C}$  NMR ( $\text{CDCl}_3$ )  $\delta$ : 147.5, 128.9, 120.0, 114.9, 42.6, 39.0 ppm.

*N*-Methyl-*N*-(4-methylphenyl)aminoacetonitrile (Table 2, entry 2; **6b**):  $^1\text{H}$  NMR ( $\text{CDCl}_3$ )  $\delta$ : 2.20 (s, 3 H), 3.01 (s, 3 H), 4.12 (s, 2 H), 6.83 (d,  $J=8.5$  Hz, 2 H), 7.12 (d,  $J=8.5$  Hz, 2 H);  $^{13}\text{C}$  NMR ( $\text{CDCl}_3$ )  $\delta$ : 145.8, 130.0, 129.9, 115.5, 115.4, 42.8, 39.5, 20.3 ppm.

*N*-Methyl-*N*-(3-methylphenyl)aminoacetonitrile (Table 2, entry 3; **6c**):  $^1\text{H}$  NMR ( $\text{CDCl}_3$ )  $\delta$ : 2.31 (s, 3 H), 2.98 (s, 3 H), 4.25 (s, 2 H), 6.66-6.68 (m, 2 H), 6.74 (d,  $J$  6.0 Hz, 1H), 7.16-7.22 (m, 1 H);  $^{13}\text{C}$  NMR ( $\text{CDCl}_3$ )  $\delta$ : 21.8, 39.2, 42.3, 112.0, 115.5, 115.6, 121.1, 129.2, 139.2, 147.8 ppm;

*N*-Methyl-*N*-(2-bromophenyl)aminoacetonitrile (Table 2, entry 4; **6d**): viscous oil;  $^1\text{H}$  NMR ( $\text{CDCl}_3$ )  $\delta$ : 2.92 (s, 3 H), 4.07 (s, 2 H), 6.98-7.04 (m, 1 H), 7.25-7.35 (m, 2 H), 7.55-7.58 (m, 1 H);  $^{13}\text{C}$  NMR ( $\text{CDCl}_3$ )  $\delta$ : 40.6, 44.8, 115.1, 119.7, 122.8, 126.3, 128.5, 133.9, 147.3 ppm.

*N*-Methyl-*N*-(4-bromophenyl)aminoacetonitrile (Table 2, entry 5; **6e**):  $^1\text{H}$  NMR ( $\text{CDCl}_3$ )  $\delta$ : 3.12 (s, 3 H), 4.16 (s, 2 H), 6.73 (d,  $J = 8.2$  Hz, 2 H), 7.28 (d,  $J = 8.2$  Hz, 2H);  $^{13}\text{C}$  NMR ( $\text{CDCl}_3$ )  $\delta$ : 146.2, 130.2, 125.4, 116.2, 115.0, 42.6, 39.2 ppm.

Anilinoacetonitrile (Table 2, entry 6; **6f**):  $^1\text{H}$  NMR ( $\text{CDCl}_3$ )  $\delta$ : 1.52 (broad s, 1H), 4.24 (s, 2 H), 6.88 (dd,  $J = 7.9$  and 1.2 Hz, 1H), 7.12 (dd,  $J = 8.2$  and 0.82 Hz, 1H), 7.15-7.20 (m, 3H);  $^{13}\text{C}$  NMR ( $\text{CDCl}_3$ )  $\delta$ : 149.5, 126.9, 120.2, 115.9, 40.6 ppm.

2-Cyano-*N*-phenylpiperidine (Table 2, entry 7; **6g**):  $^1\text{H}$  NMR ( $\text{CDCl}_3$ )  $\delta$ : 1.58-1.88 (m, 4H), 1.90-2.10 (m, 2H), 2.98-3.13 (m, 1H), 3.44-3.47 (m, 1H), 4.58 (t,  $J = 3.4$  Hz, 1H), 6.72-7.00 (m, 2H), 7.13-7.21 (m, 3H);  $^{13}\text{C}$  NMR ( $\text{CDCl}_3$ )  $\delta$ : 149.0, 128.6, 120.8, 118.0, 117.2, 52.6, 45.8, 29.1, 25.0, 20.4 ppm.

2-Cyano-*N*-phenylpyrrolidine (Table 2, entry 8; **6h**): mp 60-61°C; <sup>1</sup>H NMR (CDCl<sub>3</sub>) δ: 2.08-2.40 (m, 4H), 3.26-3.38 (m, 2H), 4.28 (dd, *J* = 4.7 and 2.5 Hz, 1H), 6.60-6.67 (m, 2H), 6.82-6.92 (m, 3H); <sup>13</sup>C NMR (CDCl<sub>3</sub>) δ: 150.7, 137.8, 119.2, 115.0, 114.6, 52.5, 47.6, 32.4, 23.6 ppm.

2-Cyano-1-phenyl-1,2,3,4-tetrahydroisoquinoline (Table 2, entry 9; **6i**): mp 101-102°C; <sup>1</sup>H NMR (CDCl<sub>3</sub>) δ 2.91 (dt, *J* = 15.8 and 3.2 Hz, 1 H), 3.08, (ddd, *J* = 15.8, 9.5, and 5.4 Hz, 1H), 3.38 (ddd, *J* = 12.5, 9.5, and 3.2 Hz, 1H), 3.79-3.84 (m, 1H), 5.52 (s, 1H), 7.00-7.06 (m, 1H), 7.09-7.12 (m, 2H), 7.22-7.26 (m, 6H); <sup>13</sup>C NMR (CDCl<sub>3</sub>) δ: 149.4, 132.8, 129.2, 129.0, 128.4, 128.1, 126.6, 117.5, 117.1, 52.6, 45.2, 27.2 ppm.

Fig. 1: IR spectra of the rithenium carbamate complex **3**

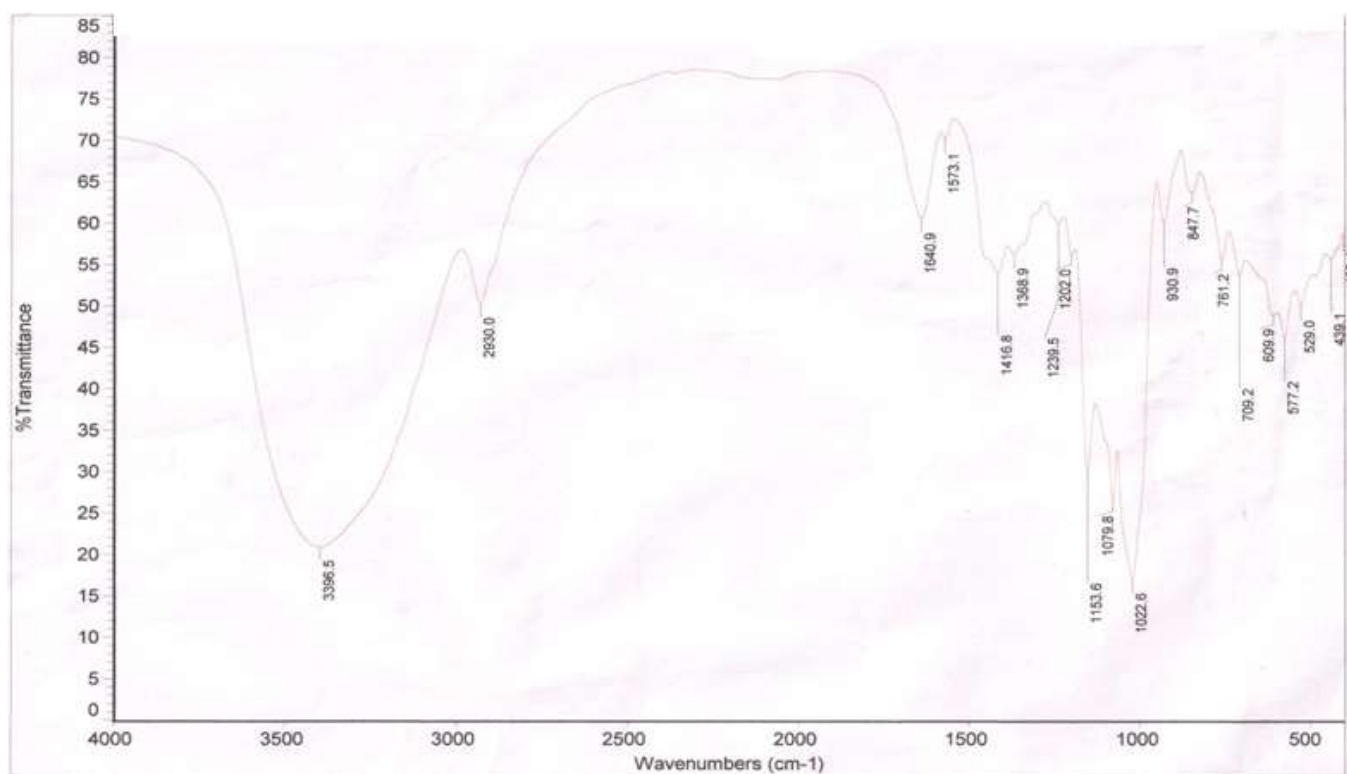

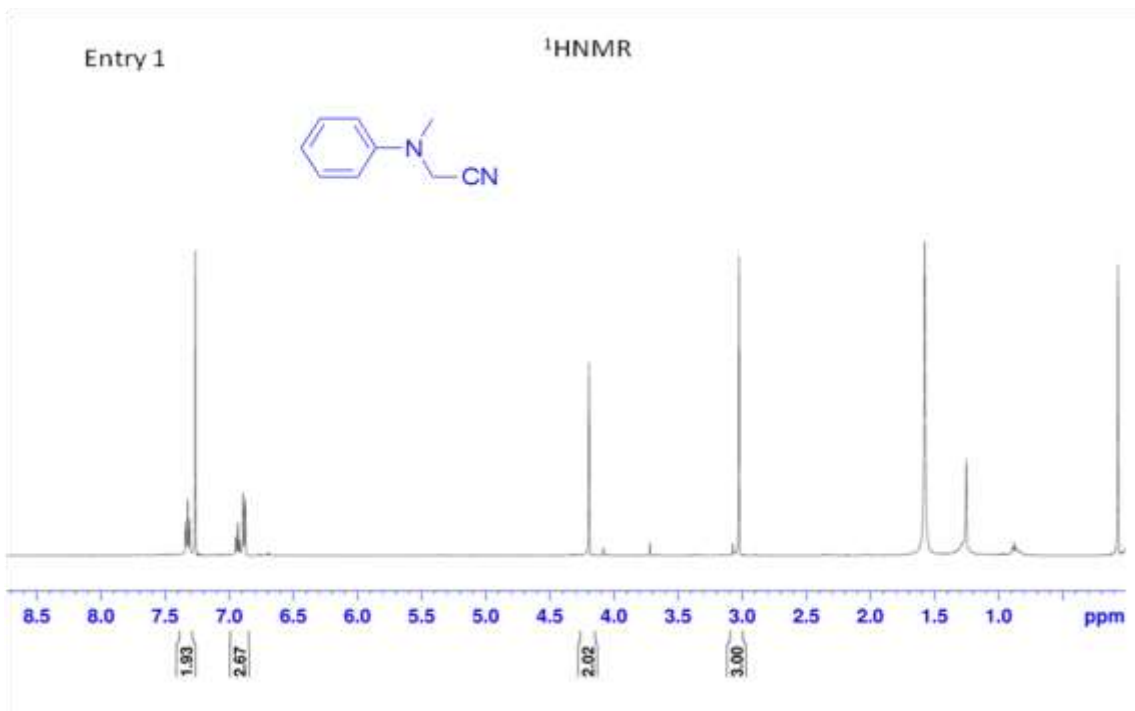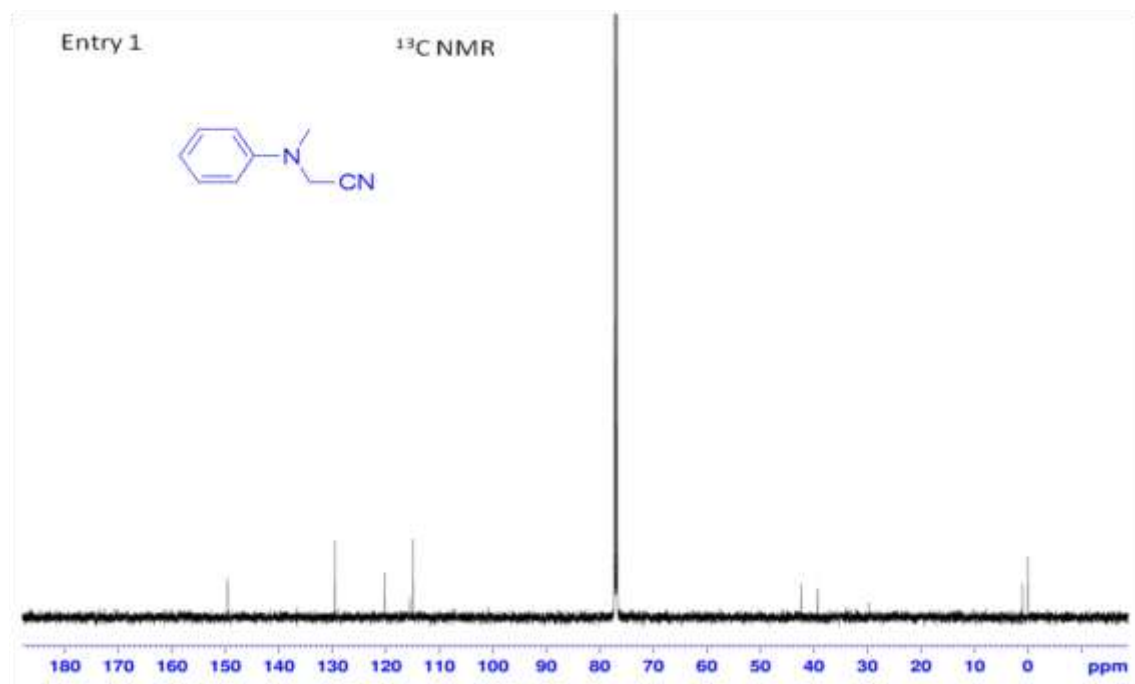

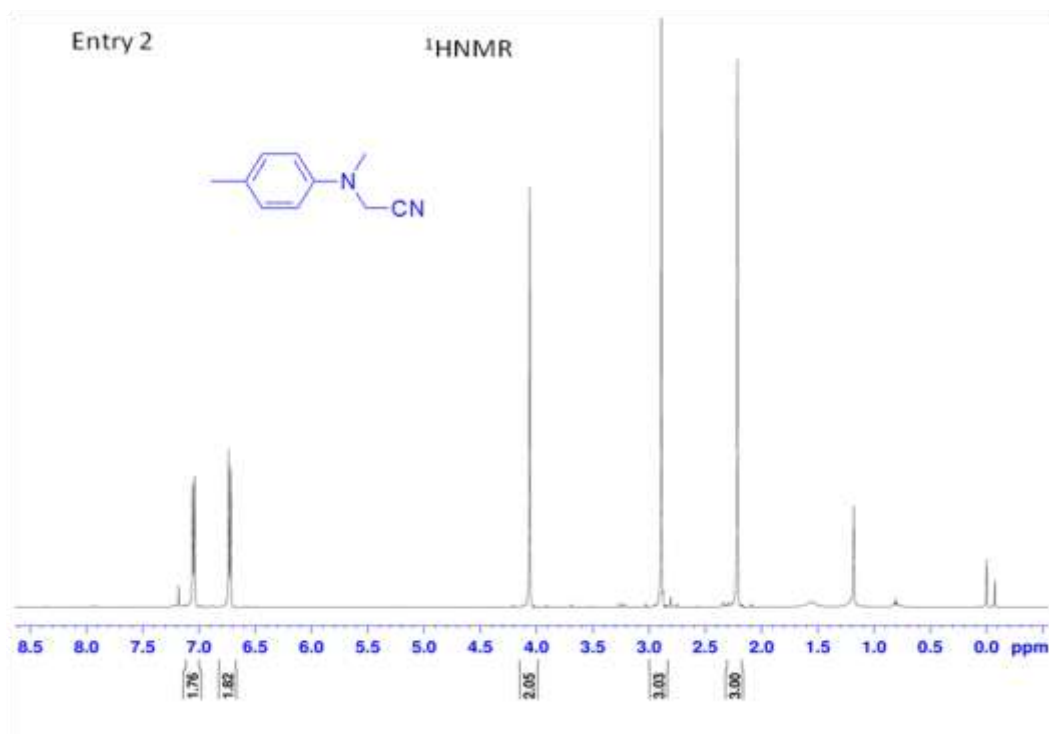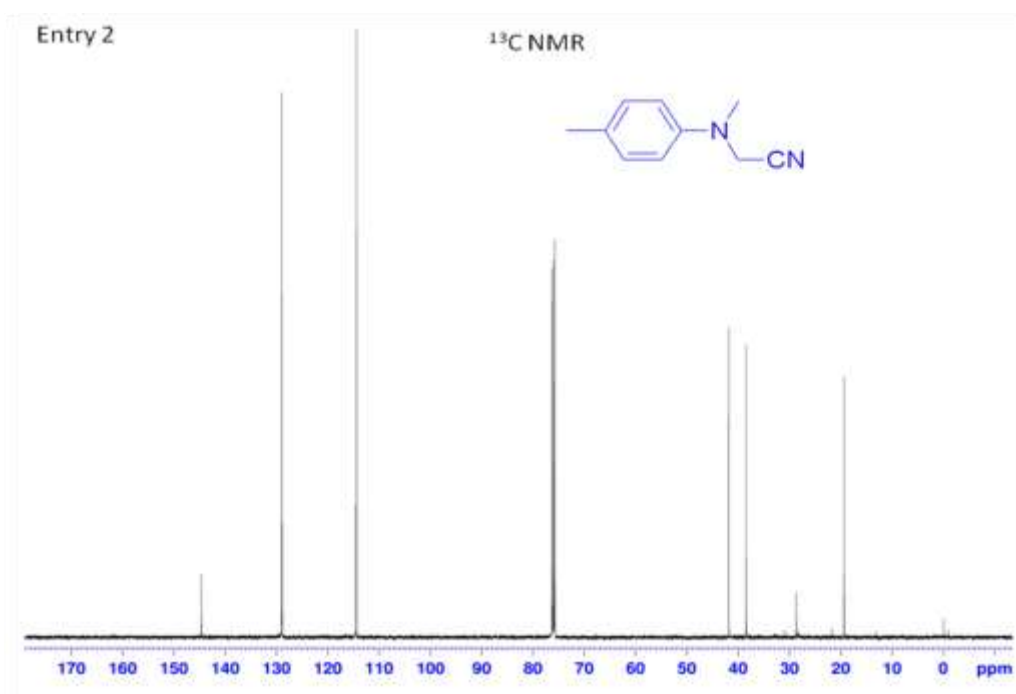

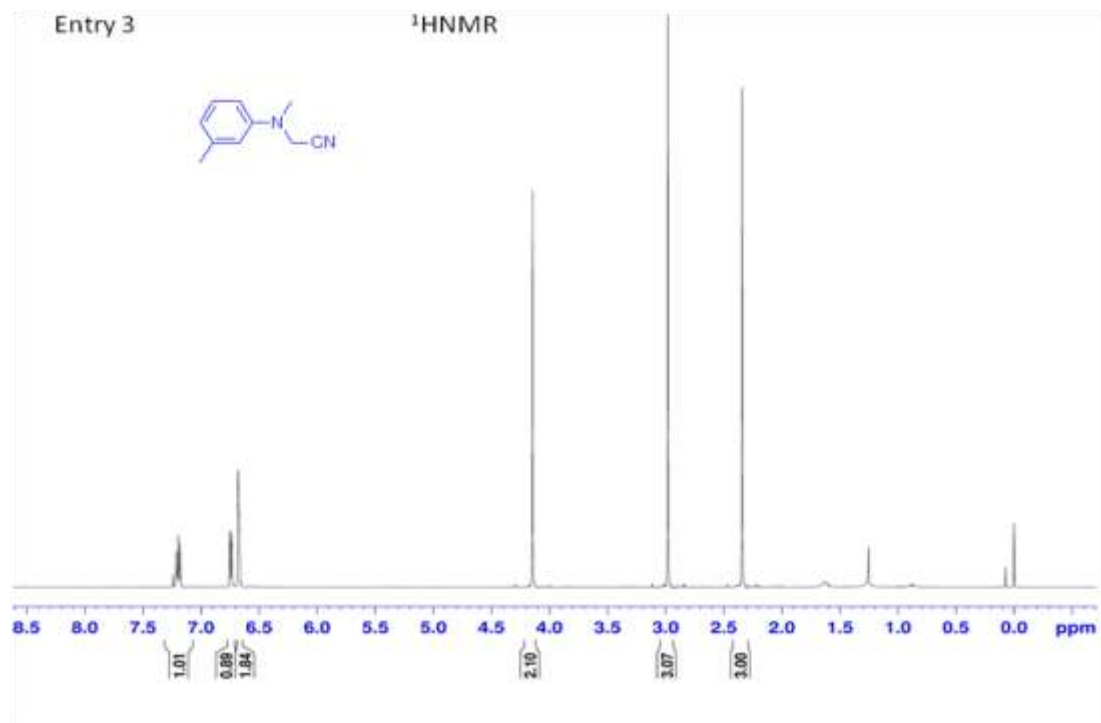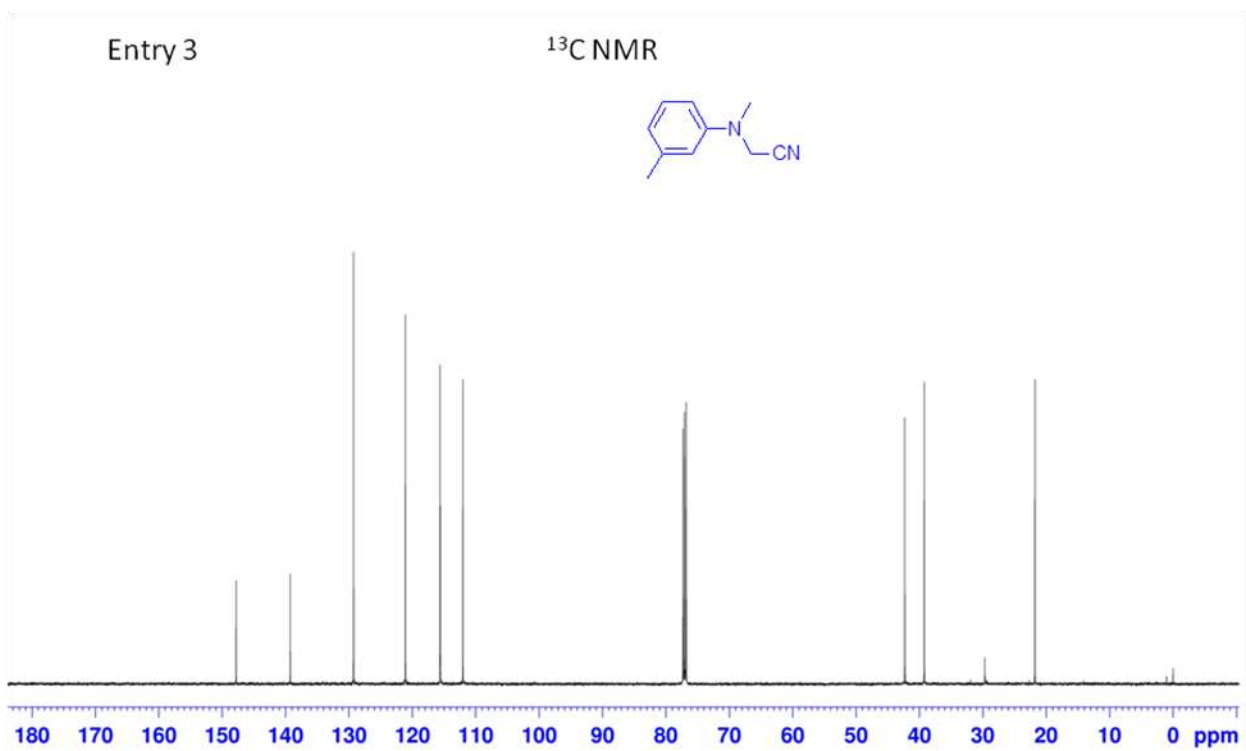



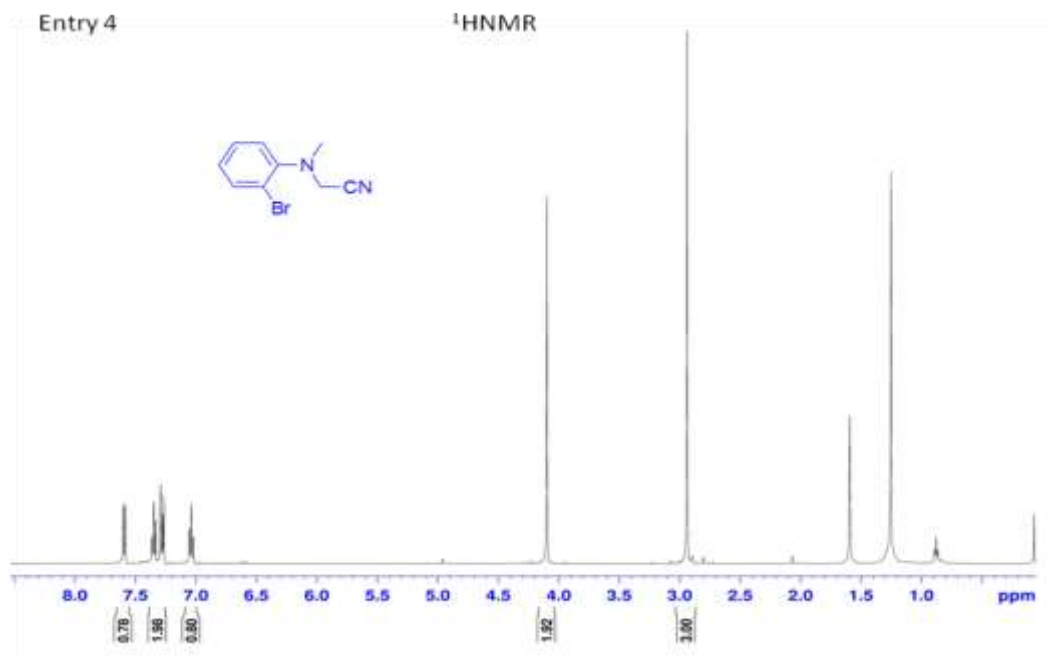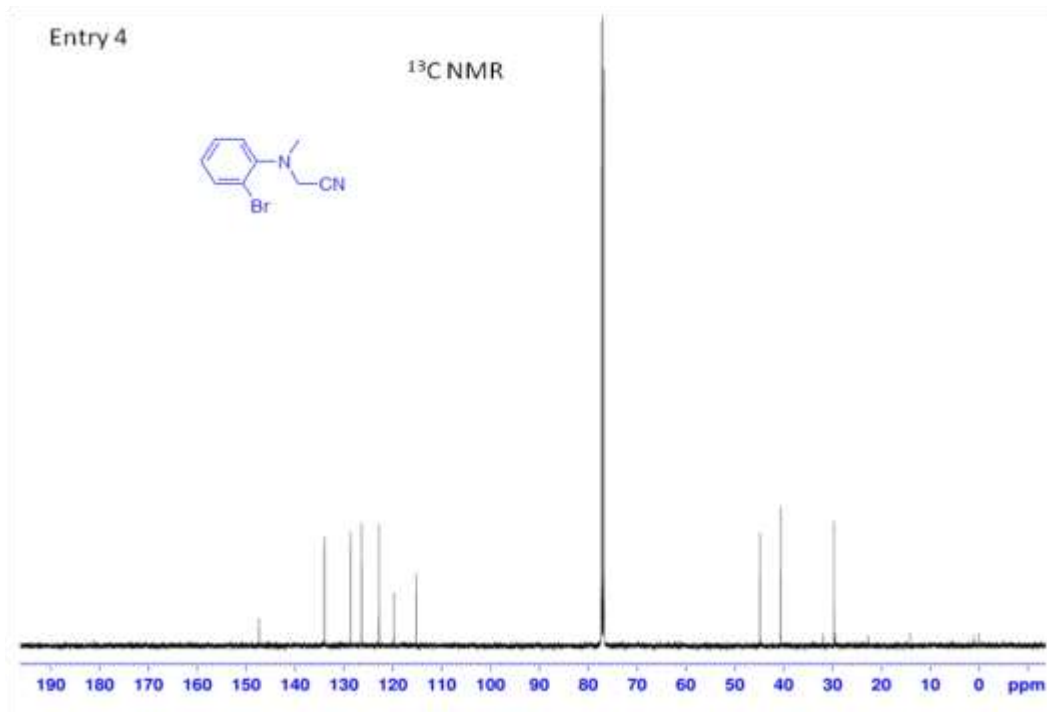

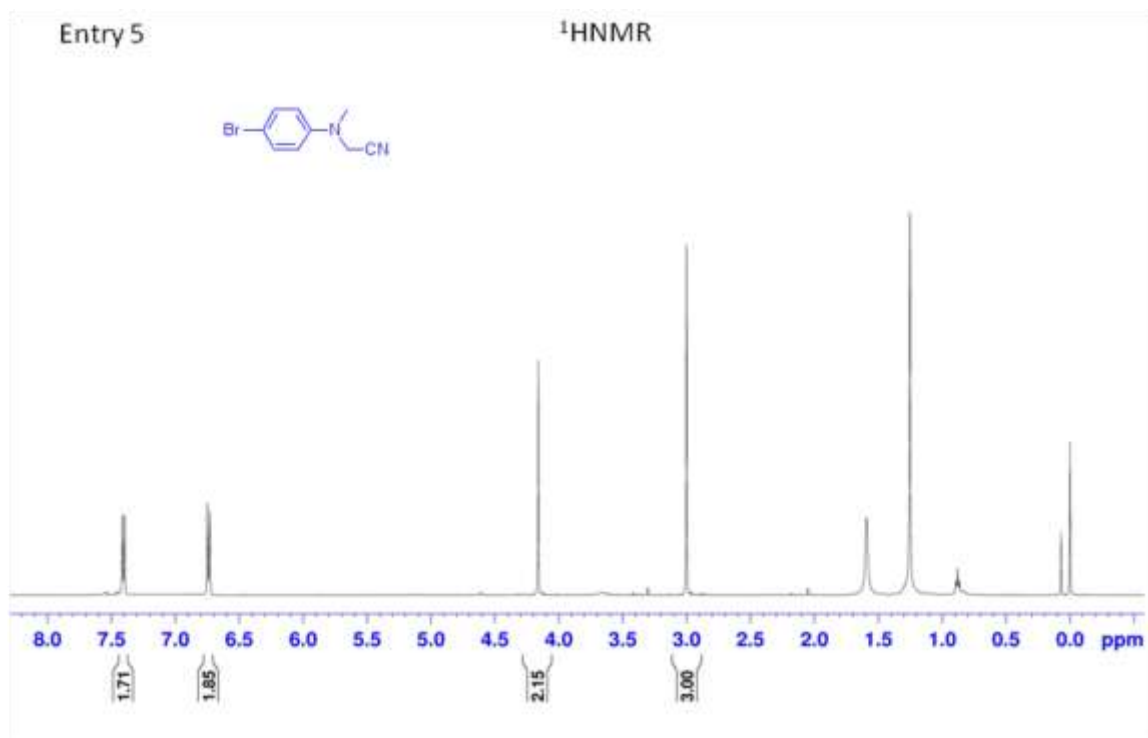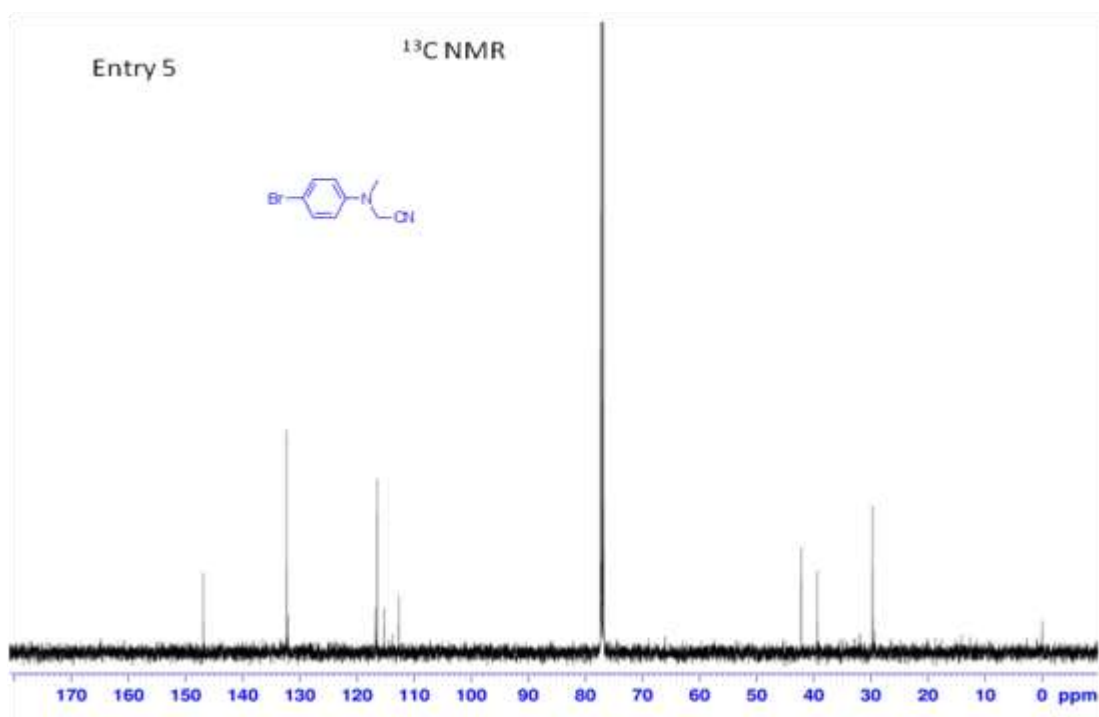

Entry 6

$^1\text{H}$ NMR

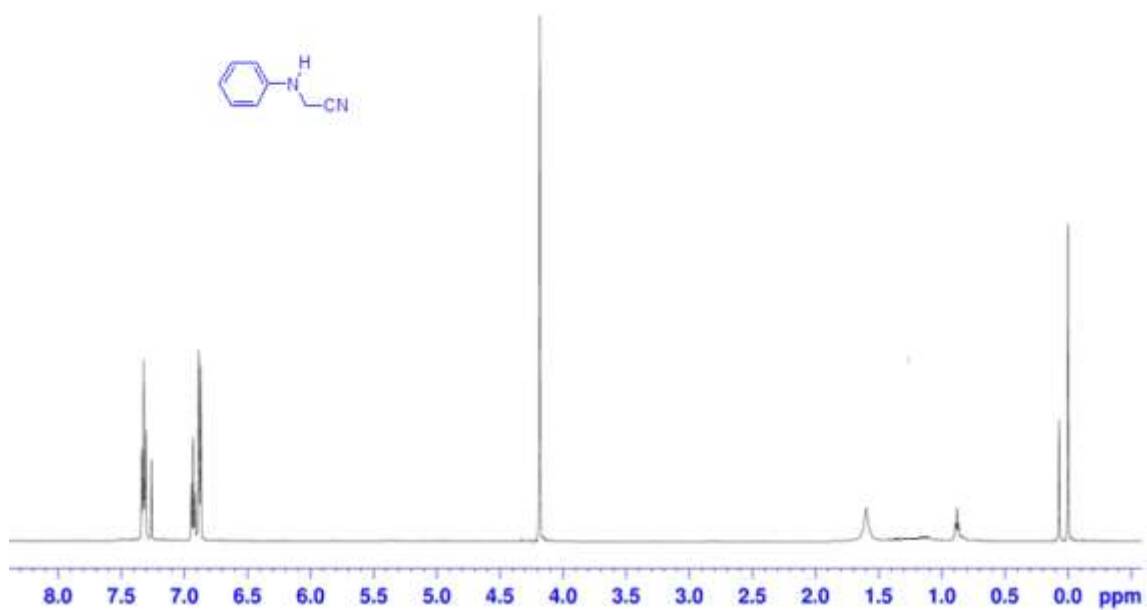

Entry 6

$^{13}\text{C}$ NMR

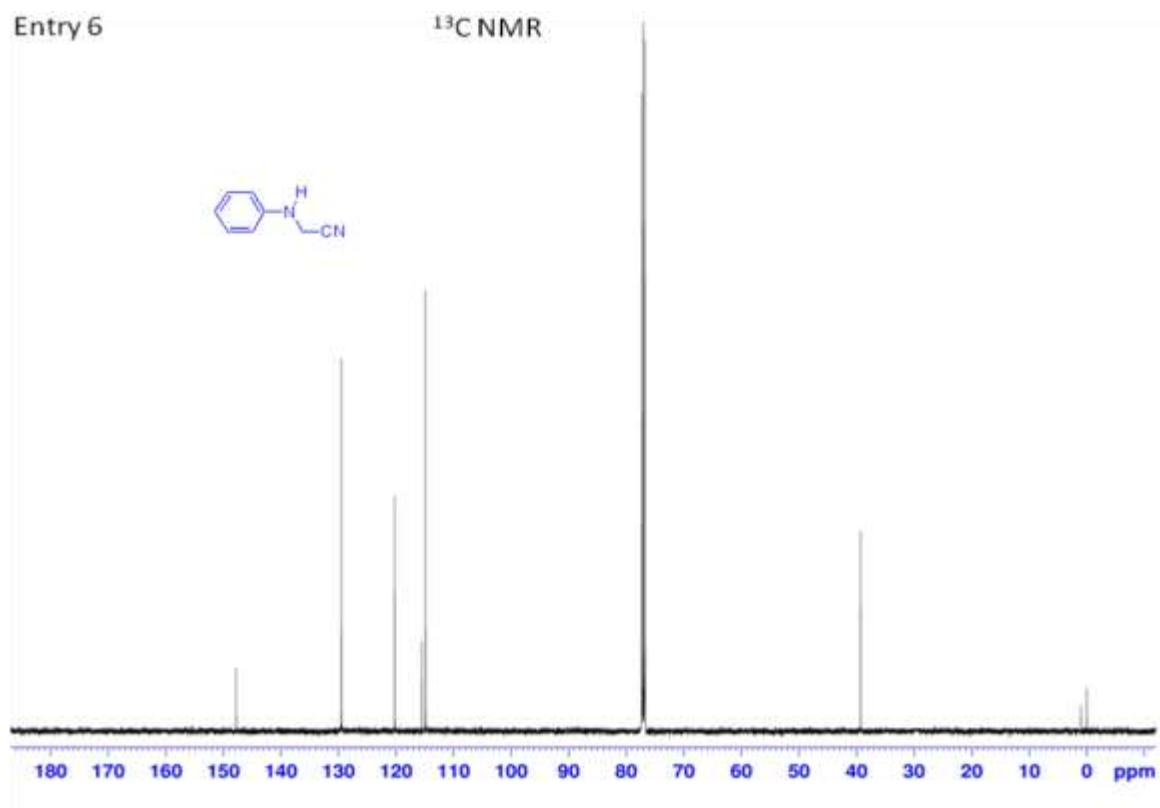

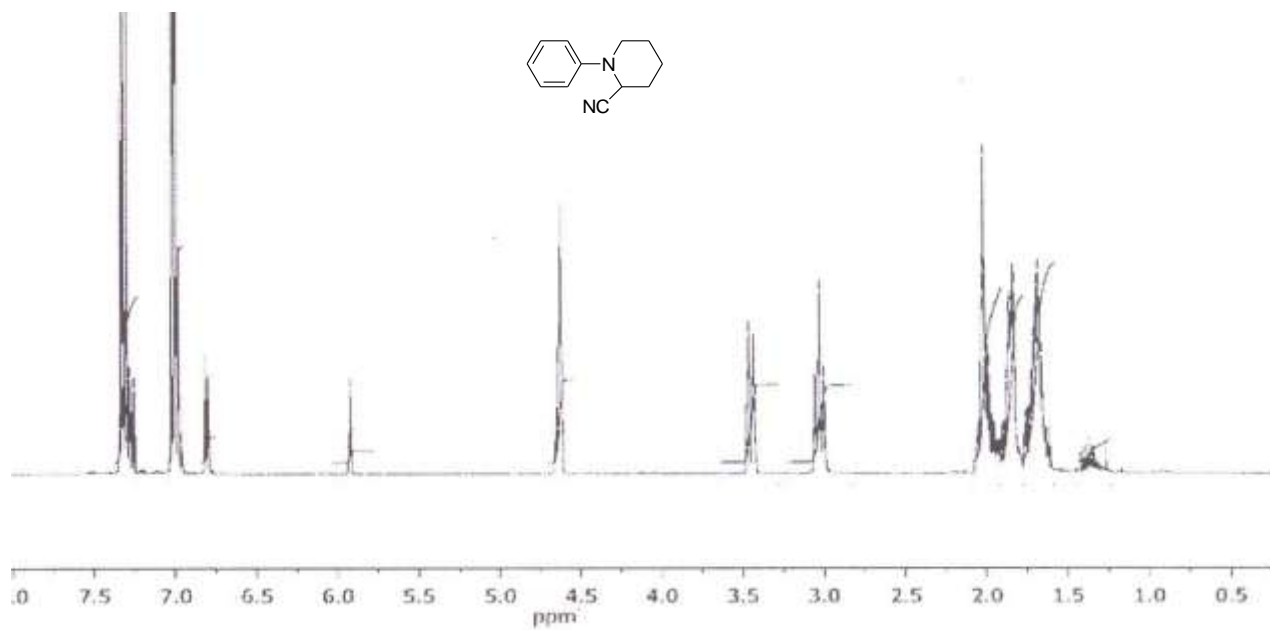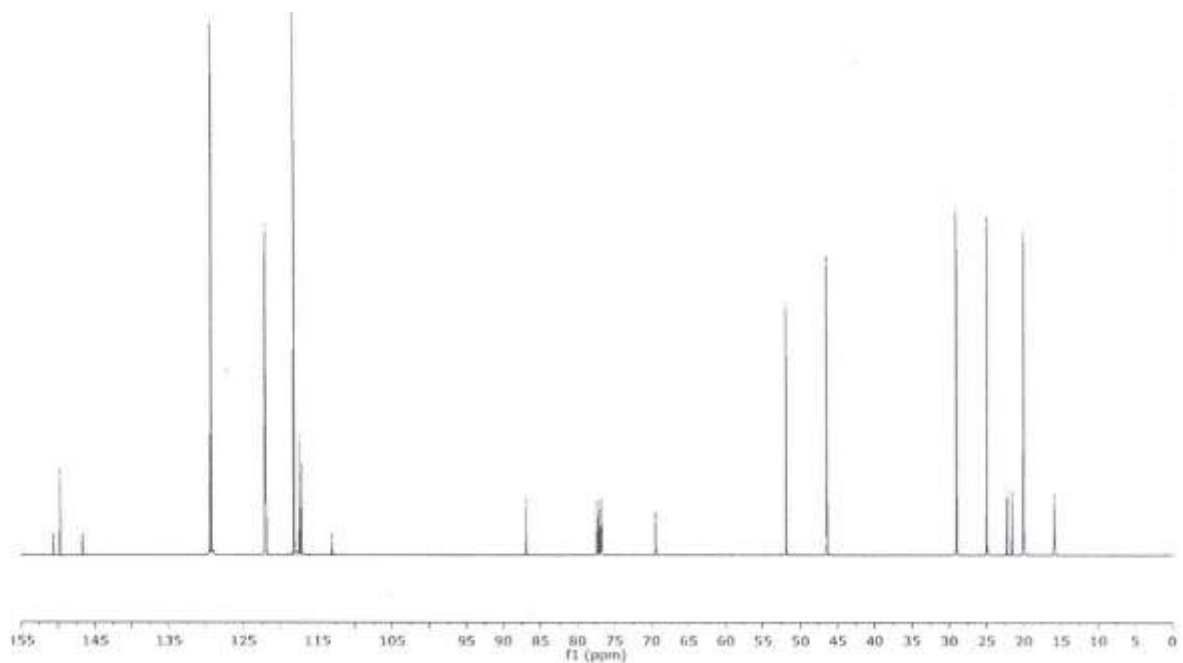

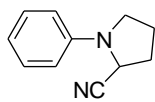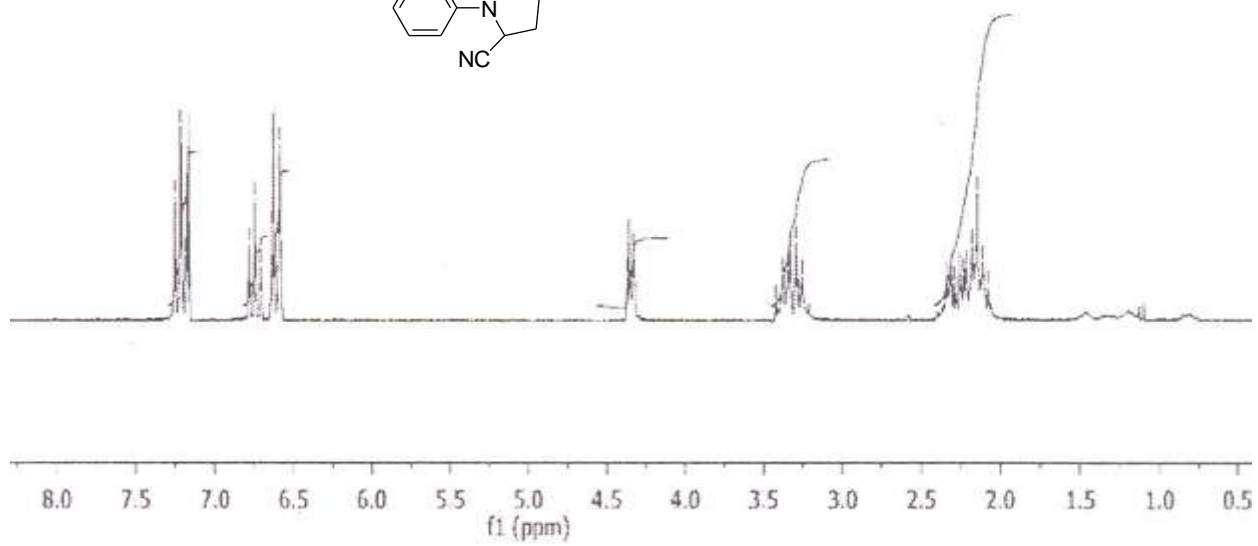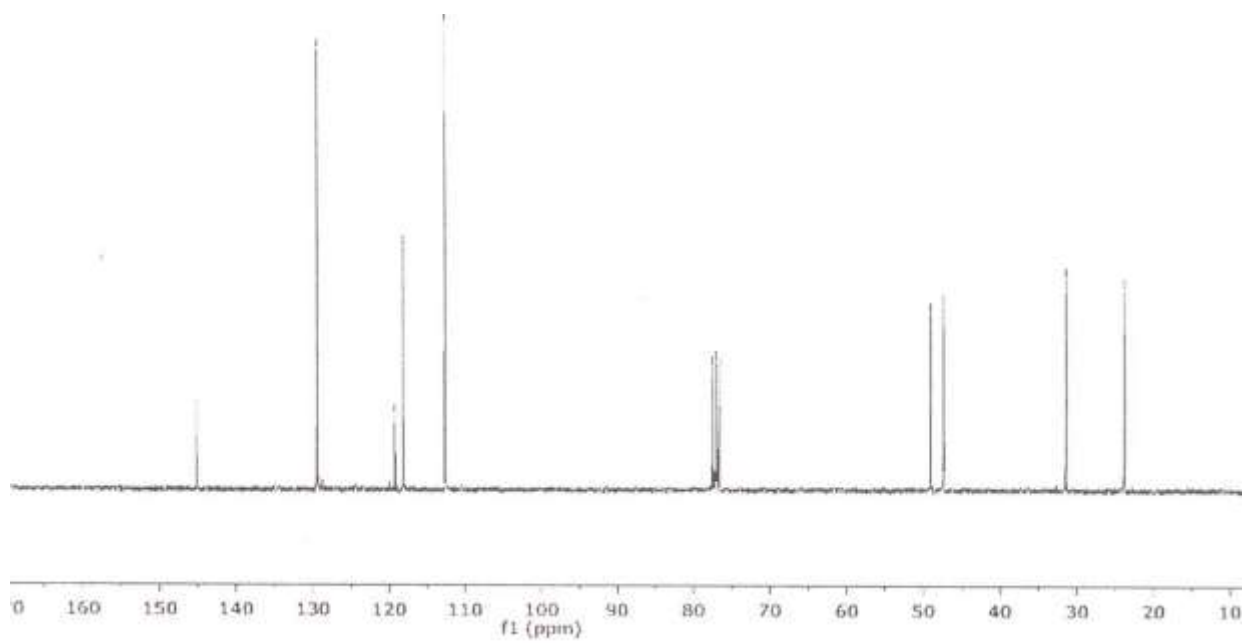

Supplement: c3ra44051f.pdf [file c3ra44051f.pdf]
